# Supplementary material for: Key evidence for personalised nutrition: a review of randomised controlled trials
Source: Royal Society of Chemistry journal article supplement (doi:10.1039/d5fo02969d), 2025-12-22
Supplement: d5fo02969d1.pdf [file d5fo02969d1.pdf]

**Table S1:** PICOS criteria for inclusion of studies included in this review.

| Category     | Inclusion Criteria                                                                                                                                                                                   | Exclusion Criteria                                                                                                                                                                                                         |
|--------------|------------------------------------------------------------------------------------------------------------------------------------------------------------------------------------------------------|----------------------------------------------------------------------------------------------------------------------------------------------------------------------------------------------------------------------------|
| Population   | Human studies                                                                                                                                                                                        | Participants < 18 years                                                                                                                                                                                                    |
| Intervention | Personalised nutrition interventions                                                                                                                                                                 | General dietary advice without specific dietary interventions tailored to an individual's characteristics and needs.                                                                                                       |
| Comparison   | Standard dietary advice, or non-personalised dietary intervention                                                                                                                                    | Studies without a control group                                                                                                                                                                                            |
| Outcome      | Studies reporting at least one measurable health-related outcome (e.g., diet quality, weight, glycaemic control, lipid levels, micronutrient status, metabolic biomarkers, or behavioural outcomes). | Studies not reporting any health-related or behavioural outcomes, or those with outcomes not relevant to nutrition.                                                                                                        |
| Study design | Randomised control trials                                                                                                                                                                            | Meta-analyses, systematic reviews, epidemiologic studies, commentary articles, animal studies, and non-original research. Articles not published in English. Non-relevant studies or those without full-text availability. |

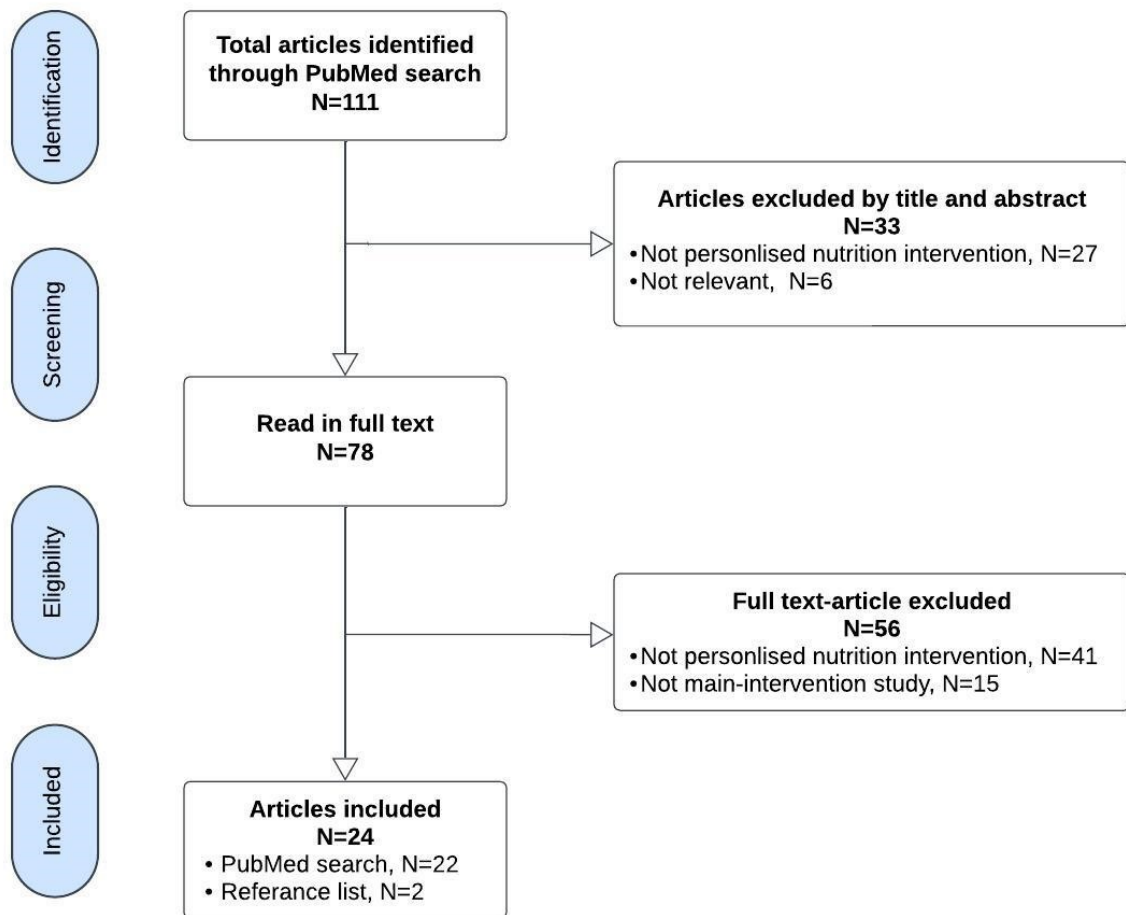

**Figure S1:** Flowchart for search strategy and study selection. The studies were included if they investigated the effects of personalised nutrition interventions.
